# Supplementary material
Source: PubMed Central journal article supplement (PMC3408772)
Supplement: NIHMS386139-supplement-01.pdf [file NIHMS386139-supplement-01.pdf]

## Supplementary Figures

**Figure s1.** Effects of Cdk2 knockdown on cell cycle progression. DBA 252 cells were transfected with 50 nM or 75nM siRNA specifically targeting Cdk2. After 60 h, the effects were analyzed for Cdk2 knockdown by Western blot (A) and for cell cycle by flow cytometry (B). The Cdk2 siRNA specifically reduced the Cdk2 expression and caused accumulation of G1 phase cells while the negative control siRNA under the same condition had no effect.

**Figure s2.** Effect of Olo II on the expression of differentiation markers. DBA 252 cells were treated with Olo II at different concentrations for 24 h. The mRNA levels of GATA4, SMA and Nestin were determined by RT-qPCR. The results are average of two experiments. The mRNA level of tested gene in control cells (0  $\mu$ M) is designated as 100%.

**Figure s3.** Effects of continuous Olo II exposure on cell cycle progression and the expression of Oct4. DBA 252 cells were treated with 5  $\mu$ M Olo II (Olo) for three days and analyzed for cell cycle by flow cytometry. At the third day, the cells were split and passed to a new dish and cultured again in the presence of 5  $\mu$ M Olo II for additional two days. The cells were then analyzed for Oct4 protein level by flow cytometry after immunostaining with ant-Oct4 antibodies. Control (Con) represents the experiments performed in parallel without Olo II treatment.

**A** Con Neg 50nM 75nM (siRNA)

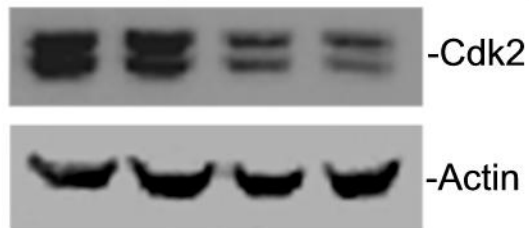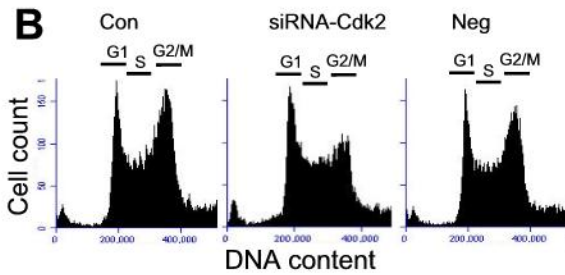

Fig.1s

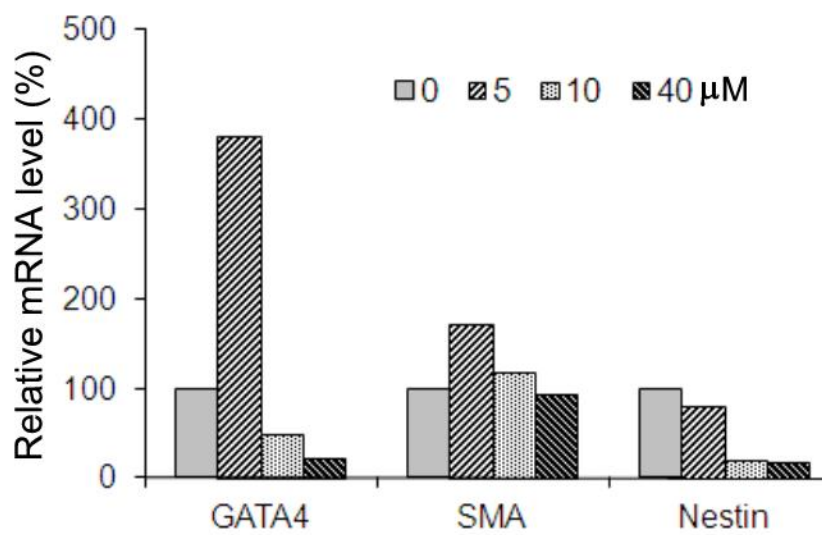

Fig.s2

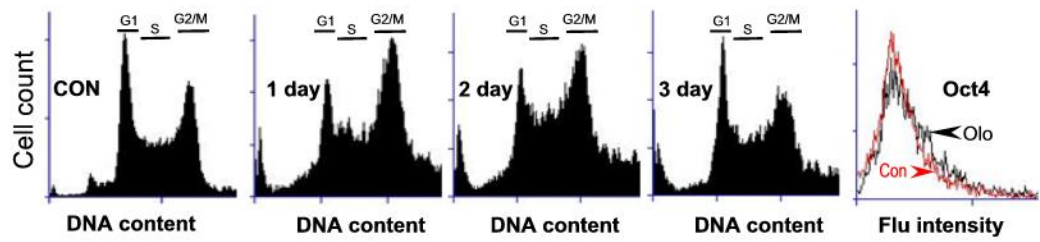

Fig. s3
